# Supplementary material
Source: HighWire-hosted journal article supplement (http://thorax.bmjjournals.com/highwire/filestream/173921/field_highwire_adjunct_files/2/6210848fige3.pdf)

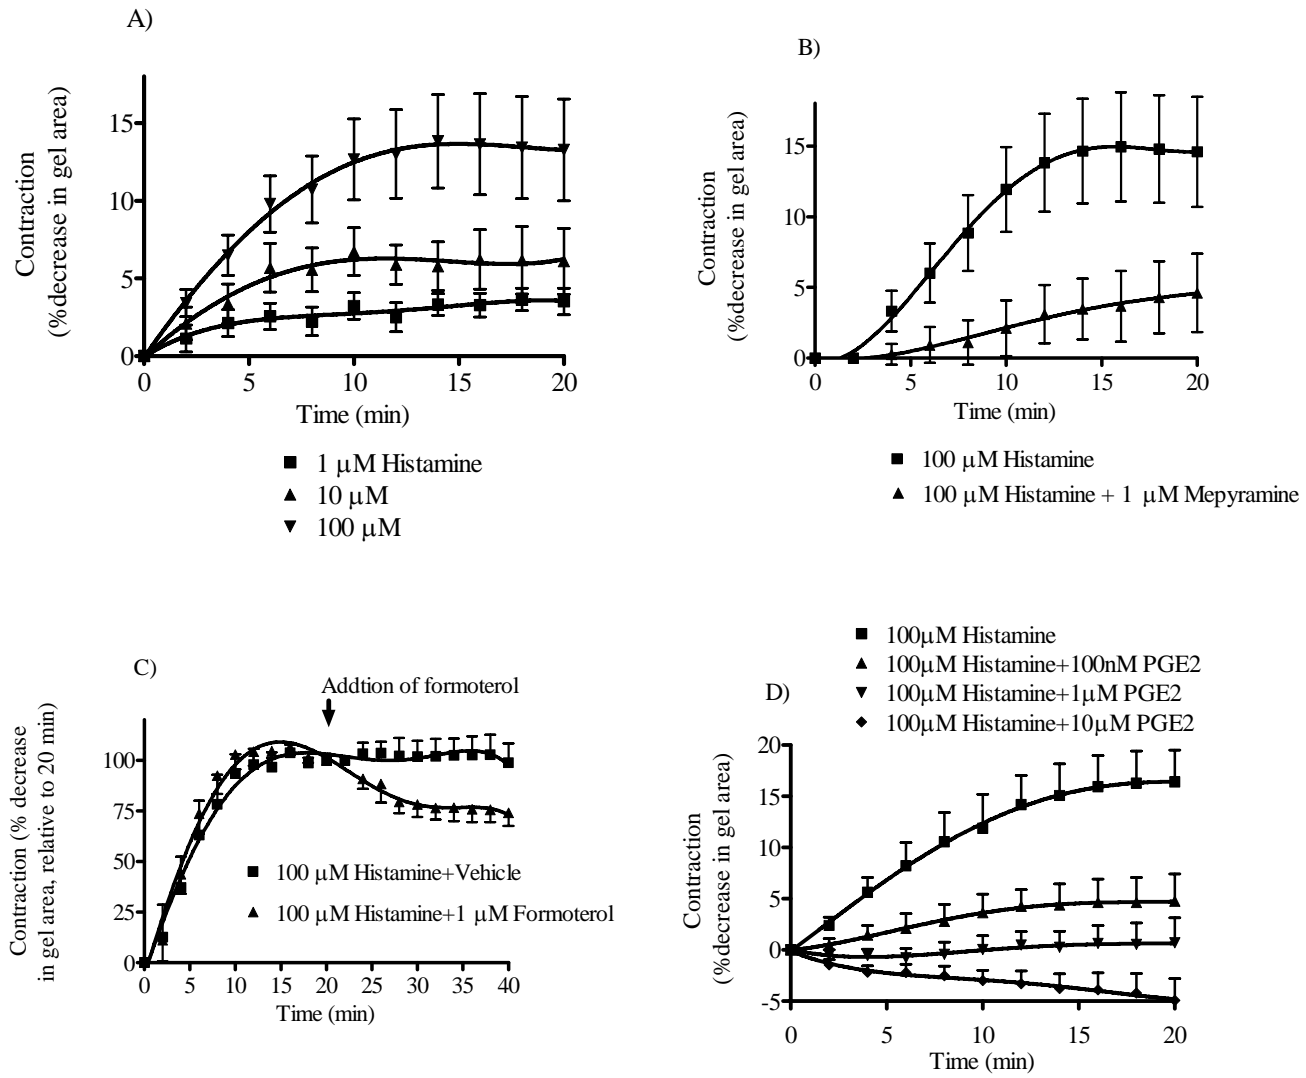

Figure E3

Supplement: 6210848fige3.pdf [file 6210848fige3.pdf]
